# Supplementary material
Source: Springer Nature journal article supplement (https://www.springermedizin.de/resource/supplementary/12958_2014_1297_MOESM1_ESM.pdf/9567032)

FAPP-A  
(mU/mL)

■ Control    ● Trisomy 21    ▼ Trisomy 18    × Trisomy 13

100

80

60

40

20

10

10-13

14-17

18-21

22-25

26-29

30-33

WG

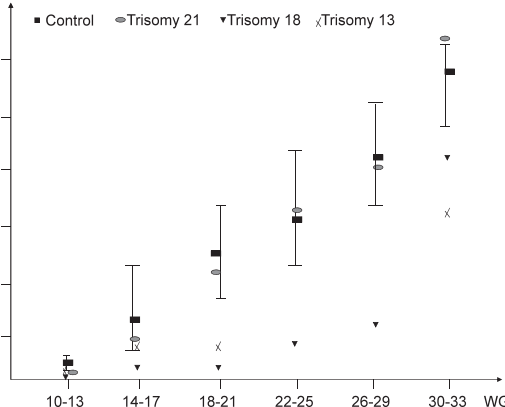

Supplement: MOESM1 [file 9567032]
